# Supplementary material for: Neuroretinal degeneration in a mouse model of systemic chronic immune activation observed by proteomics
Source: PubMed Central journal article supplement (PMC11043527; doi:10.3389/fimmu.2024.1374617), 2024-04-11
Supplement: Image_1.pdf [file Image_1.pdf]

# Supplementary Fig. S1

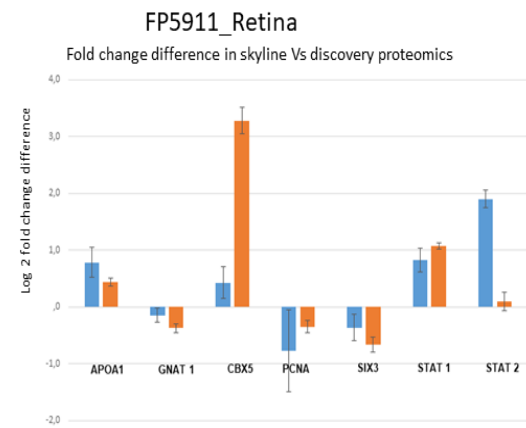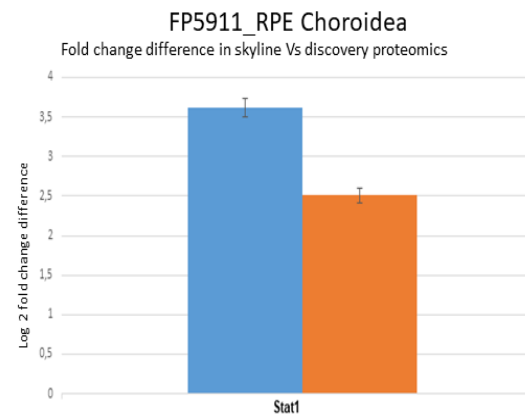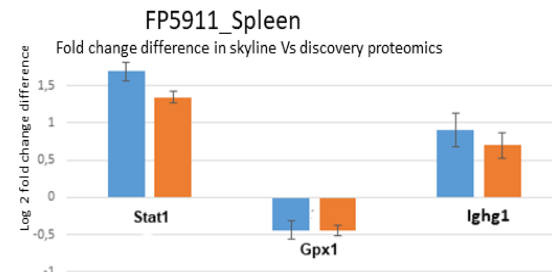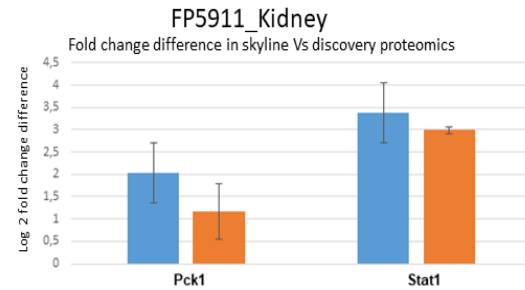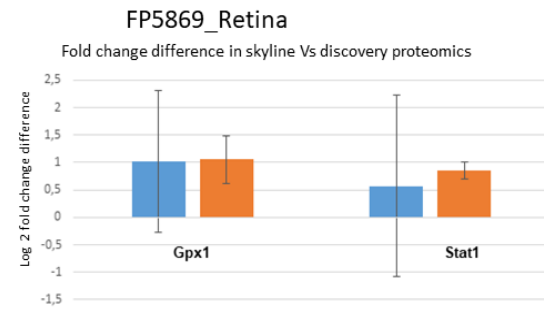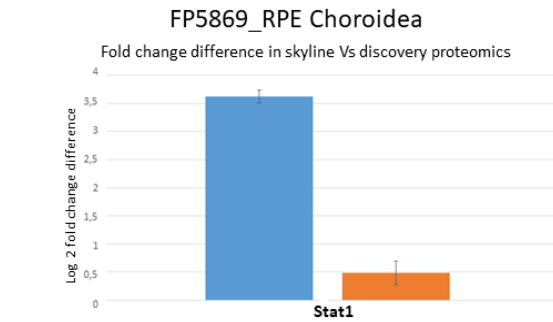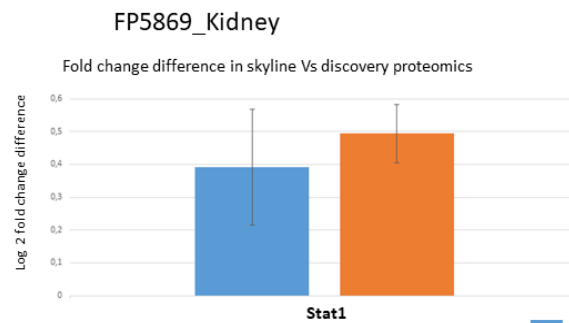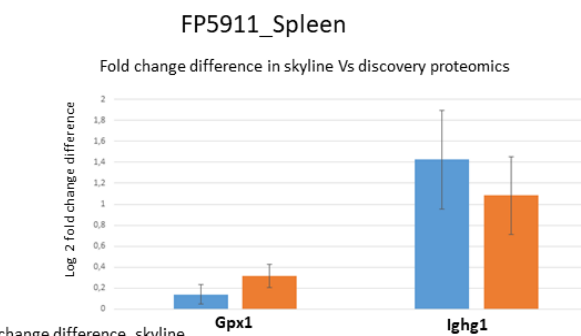

■ Log2 fold change difference\_skyline  
■ Log2 fold change difference\_discovery
