# Supplementary material for: Neuroretinal degeneration in a mouse model of systemic chronic immune activation observed by proteomics
Source: PubMed Central journal article supplement (PMC11043527; doi:10.3389/fimmu.2024.1374617), 2024-04-11
Supplement: Image_2.pdf [file Image_2.pdf]

# Supplementary Fig. S2A

## Neuroretina 1 week

Retina FP5911AB LCMV protein ID for IPA p0.05 user dataset Summary Graph

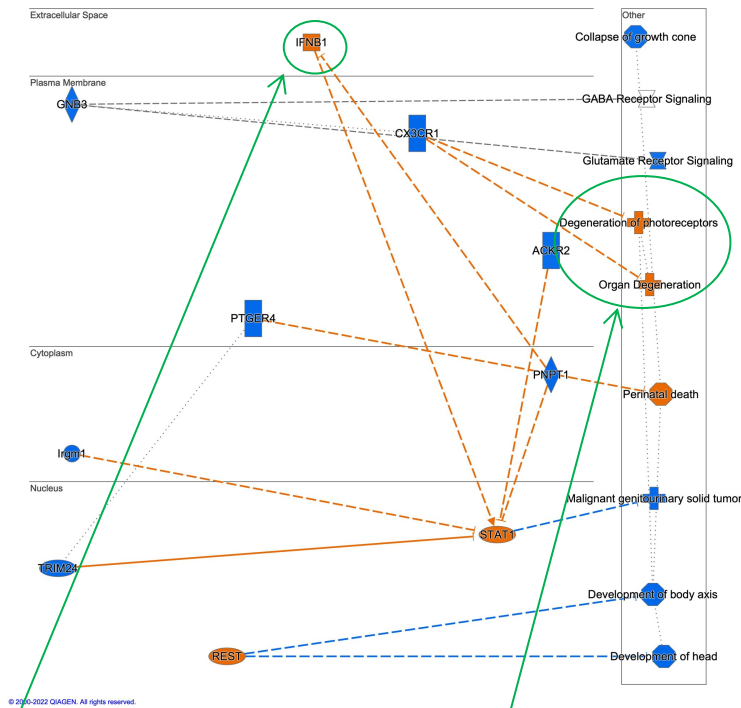

Weak cytokine response (17 protein changes)  
 No/little immune response  
 No changed susceptibility to infection  
 Down: Cell cycle control of DNA replication  
 Down: Transcription  
Substantial degeneration

## 8 weeks

Retina FP5868 LCMV protein ID for IPA p0.05 user dataset Summary Graph

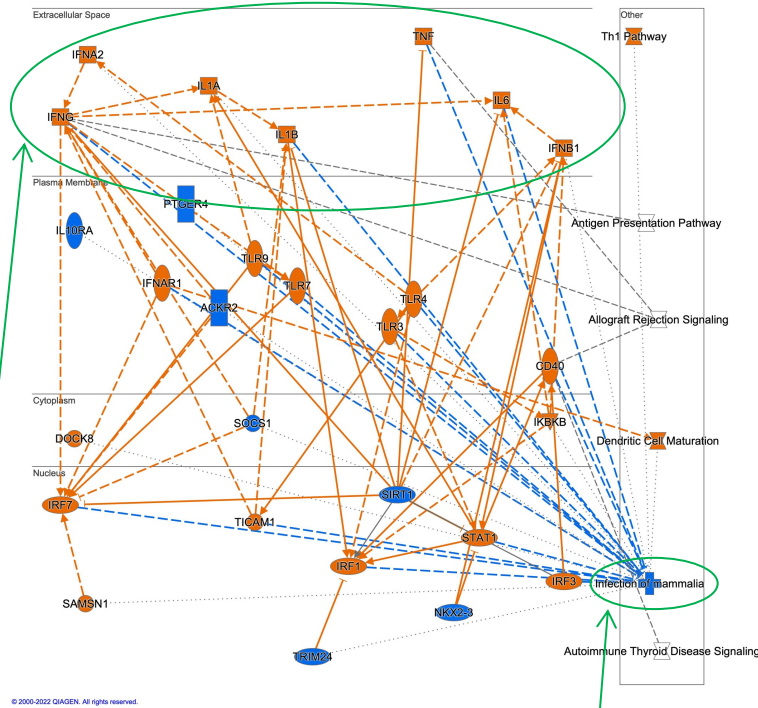

Moderate cytokine response (112 protein changes)  
 Strong immune response  
Decreased susceptibility to infection  
 No apparent sign of degeneration

## 28 weeks

Retina FP5869 LCMV protein ID for IPA p0.05 user dataset Summary Graph

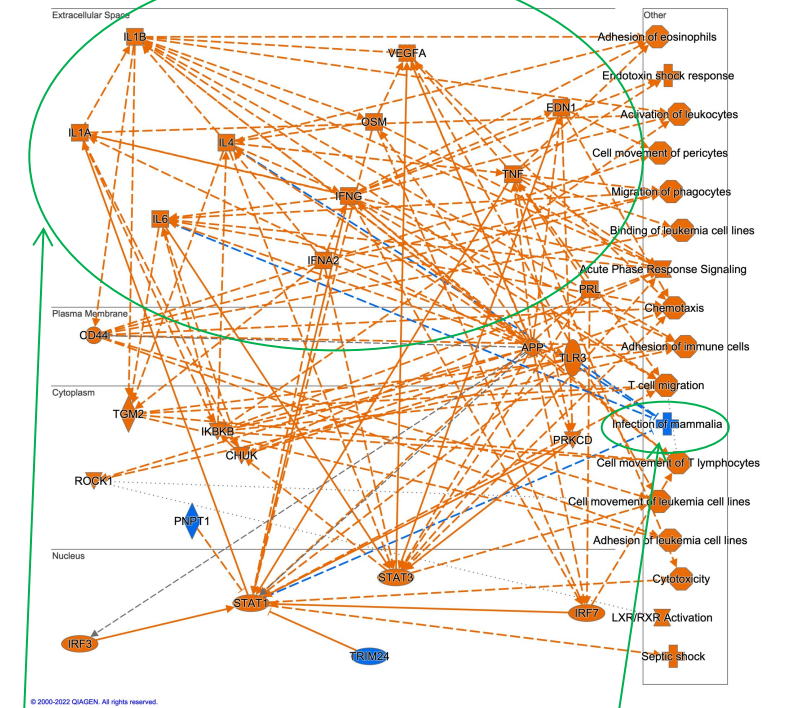

Moderate cytokine response (122 protein changes)  
 Strong immune response  
Decreased susceptibility to infection  
 Degeneration
