# Supplementary material for: Neuroretinal degeneration in a mouse model of systemic chronic immune activation observed by proteomics
Source: PubMed Central journal article supplement (PMC11043527; doi:10.3389/fimmu.2024.1374617), 2024-04-11
Supplement: Image_3.pdf [file Image_3.pdf]

# Supplementary Fig. S2B

## RPE/choroid 1 week

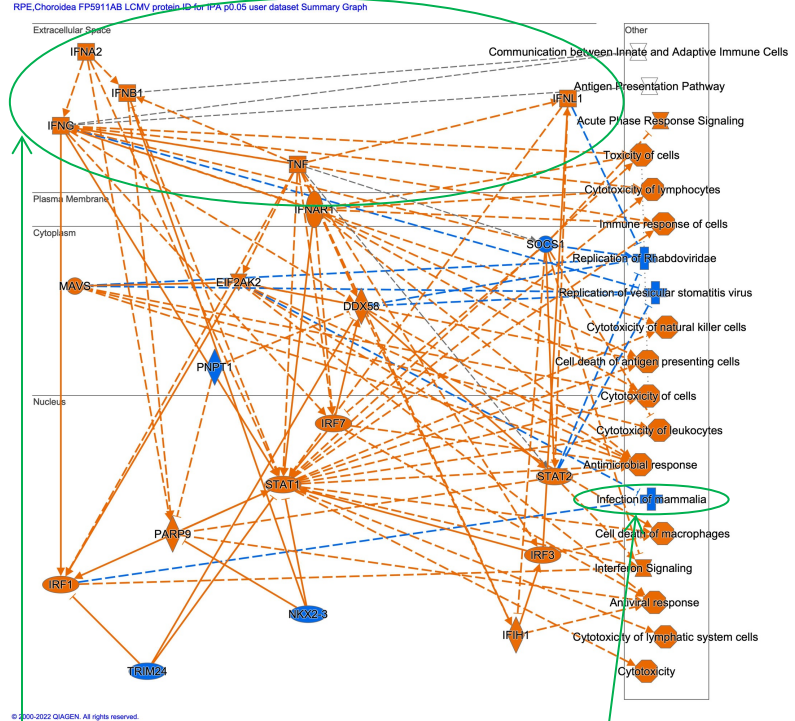

**Strong cytokine response (356 protein changes)**  
**Strong immune response**  
Decreased susceptibility to infection  
 Up: Cell cycle control of DNA replication  
 Down: Glycolysis  
 Up: Actin cytoskeleton signalling  
 No degeneration

## 8 weeks

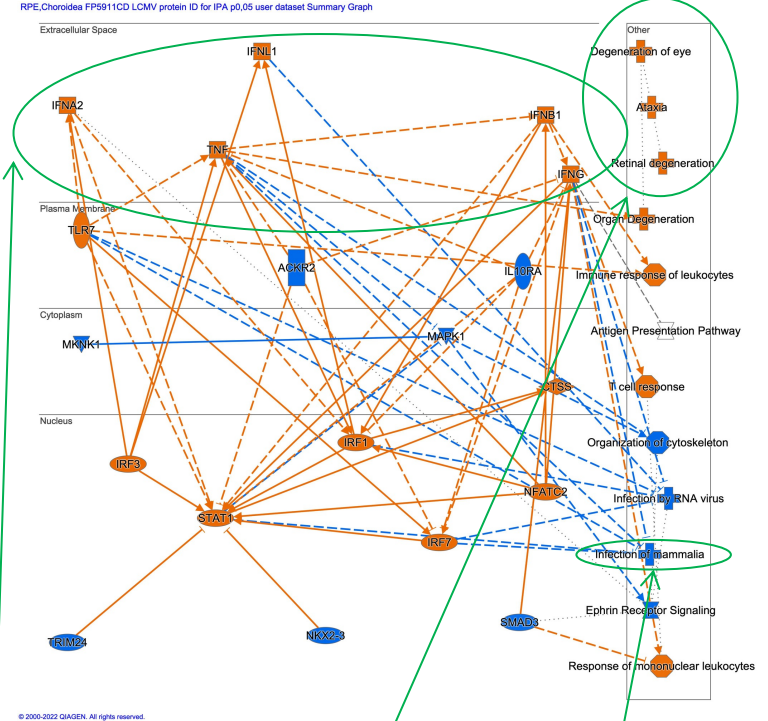

**Strong cytokine response (313 protein changes)**  
**Strong immune response**  
Decreased susceptibility to infection  
 Down: Integrin signalling  
  
 Down: Actin cytoskeleton signalling  
Degeneration

## 28 weeks

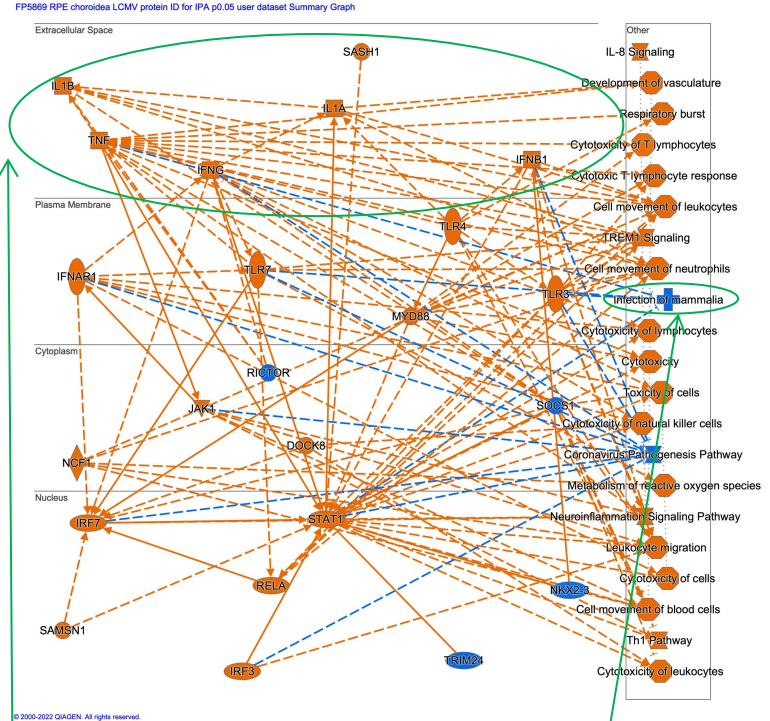

**Strong cytokine response (385 protein changes)**  
**Strong immune response**  
Decreased susceptibility to infection  
  
 Up: Actin cytoskeleton signalling  
 Some degeneration
