# Supplementary material for: Neuroretinal degeneration in a mouse model of systemic chronic immune activation observed by proteomics
Source: PubMed Central journal article supplement (PMC11043527; doi:10.3389/fimmu.2024.1374617), 2024-04-11
Supplement: Image_5.pdf [file Image_5.pdf]

# Supplementary Fig. S2D

## Spleen 1 week

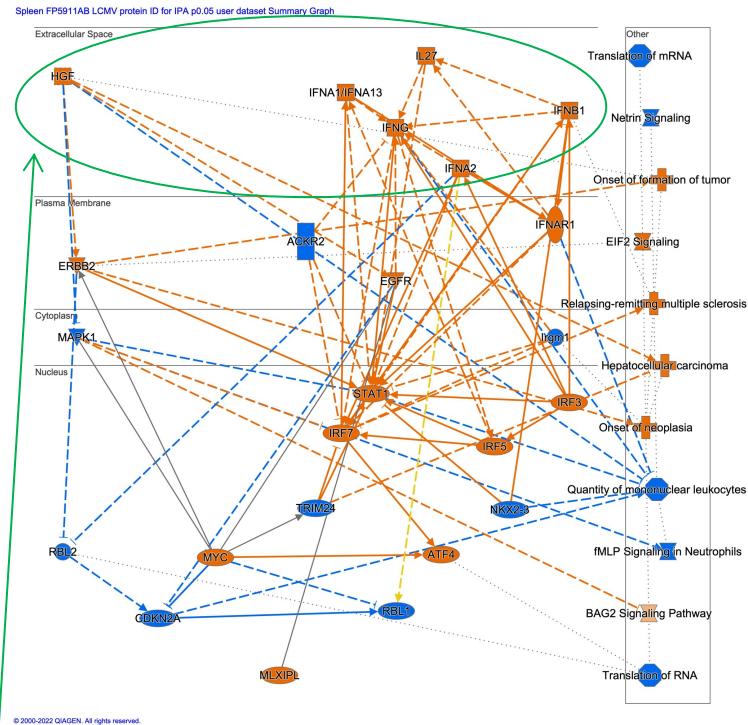

**Strong cytokine response (487 protein changes)**

Weak immune response  
 Decreased susceptibility to infection  
 Up: Cell cycle control of DNA replication  
 Up: IEF2 signalling (transcription initiation)  
 Down: Translation  
 Down: Integrin signalling  
 No degeneration

## 8 weeks

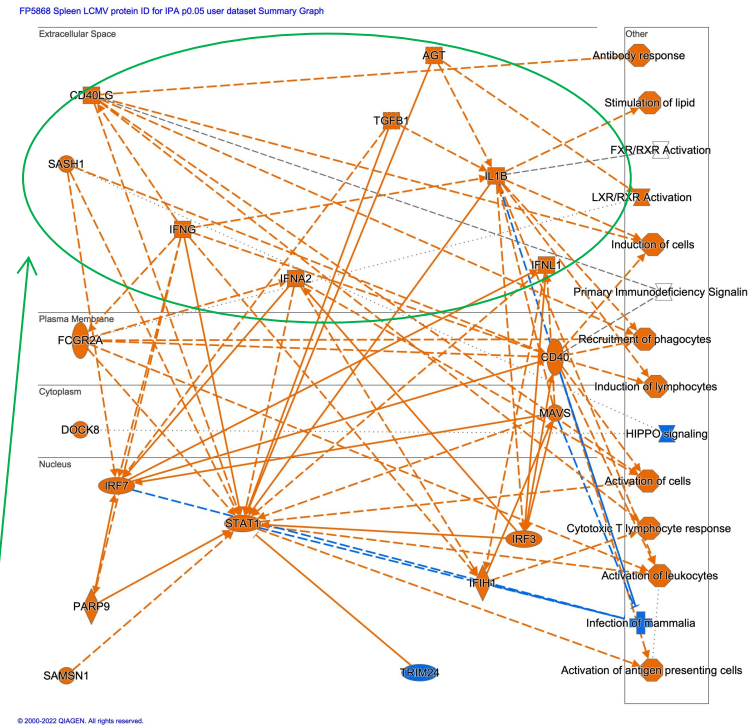

**Moderate cytokine response (158 protein changes)**

Immune response  
 Decreased susceptibility to infection  
 Up: Oxidative phosphorylation  
 No degeneration

## 28 weeks

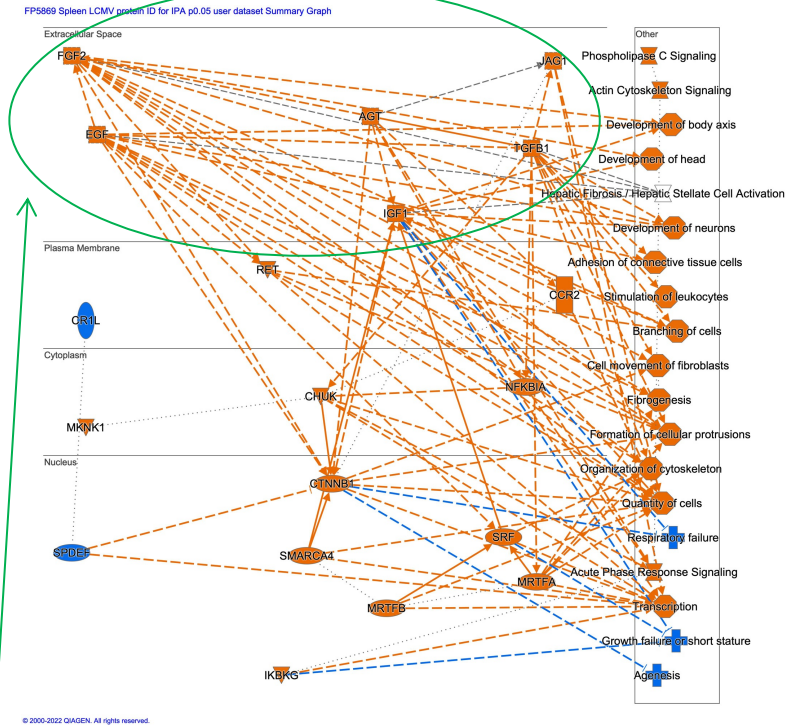

**No cytokine response  
 Growth factor response (156 protein changes)**

Immune response  
 Up: Transcription  
 Up: Integrin signalling  
 Up: Formation of cytoskeleton  
 No major STAT1 effect  
 No degeneration
