# Supplementary material for: Neuroretinal degeneration in a mouse model of systemic chronic immune activation observed by proteomics
Source: PubMed Central journal article supplement (PMC11043527; doi:10.3389/fimmu.2024.1374617), 2024-04-11

Fig. S3A "Antibody response"

Neuroretina 1 week  
Not Significant

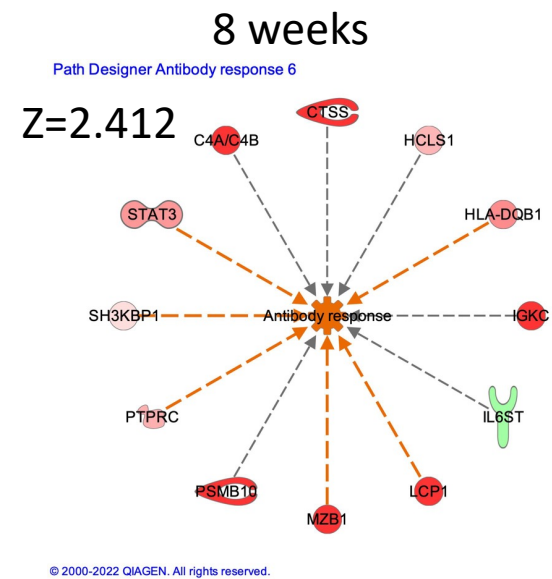

28 weeks  
Not Significant

RPE/choroid 1 week

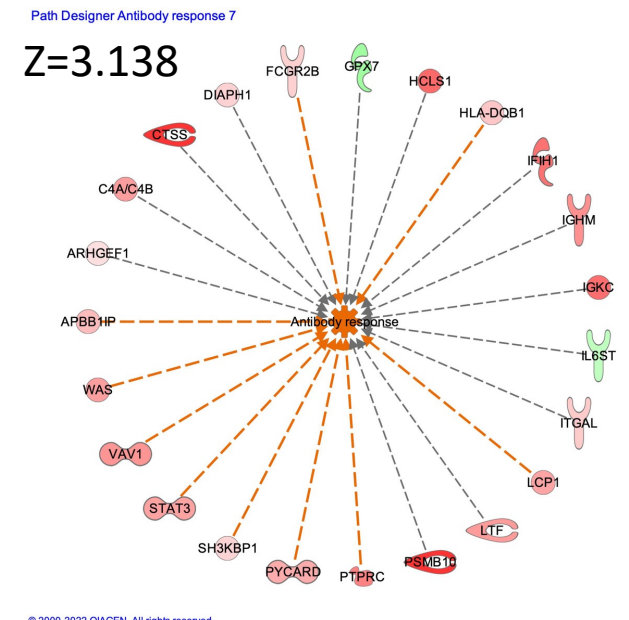

8 weeks  
Not Significant

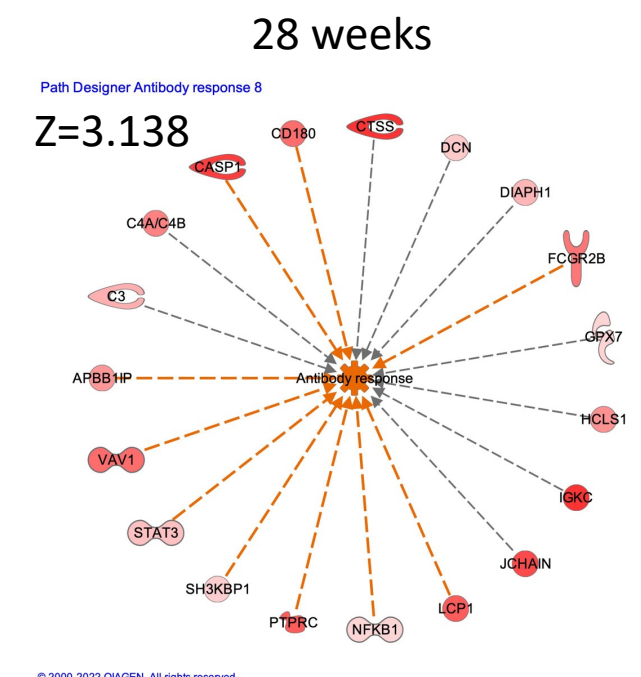

Supplement: Image_6.pdf [file Image_6.pdf]
