# Supplementary material for: Neuroretinal degeneration in a mouse model of systemic chronic immune activation observed by proteomics
Source: PubMed Central journal article supplement (PMC11043527; doi:10.3389/fimmu.2024.1374617), 2024-04-11

# Fig. S3B "Complement activation"

Neuroretina 1 week  
Not Significant

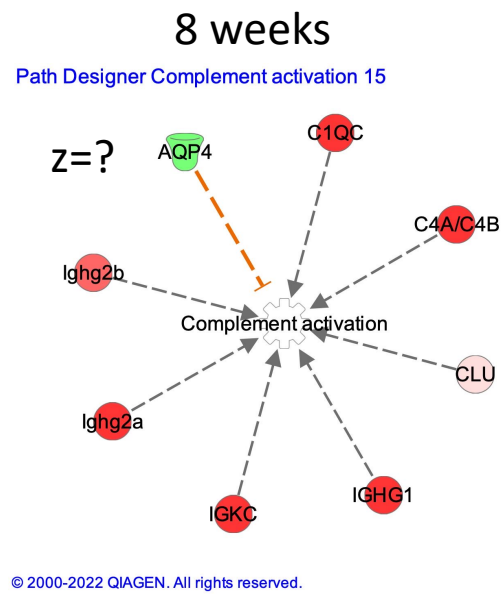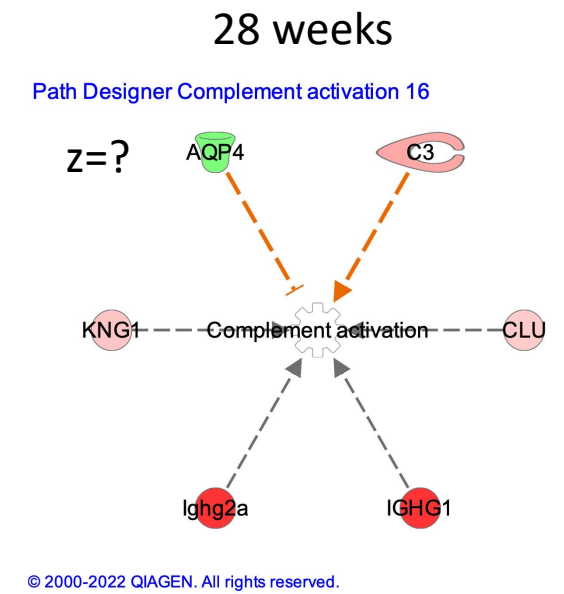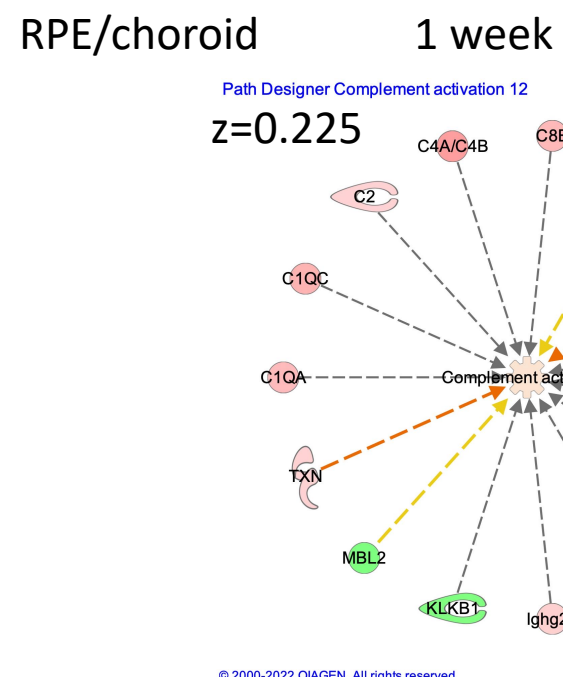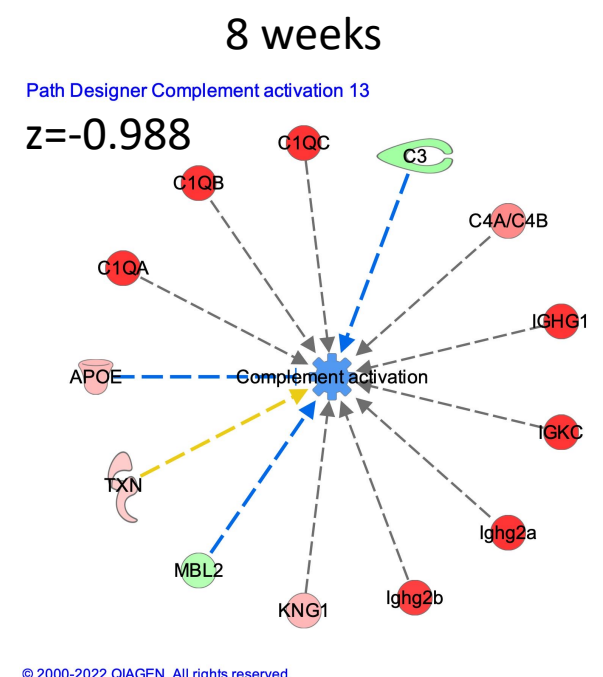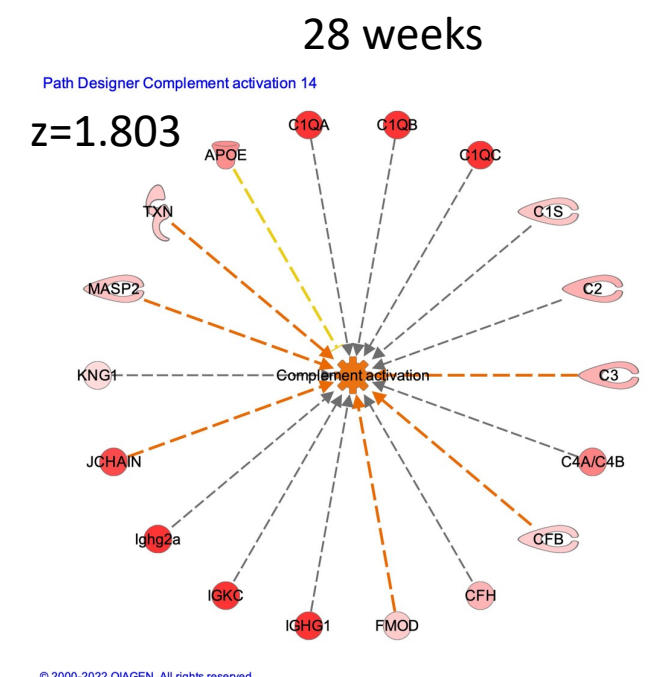

Supplement: Image_7.pdf [file Image_7.pdf]
