# Supplementary material for: Neuroretinal degeneration in a mouse model of systemic chronic immune activation observed by proteomics
Source: Front Immunol. 2024 Apr 11;15:1374617. doi: 10.3389/fimmu.2024.1374617 (PMC11043527; doi:10.3389/fimmu.2024.1374617)
Supplement: Supplementary file 6 [file Image_4.pdf]

Supplementary Fig. S2C

Kidney  
1 week

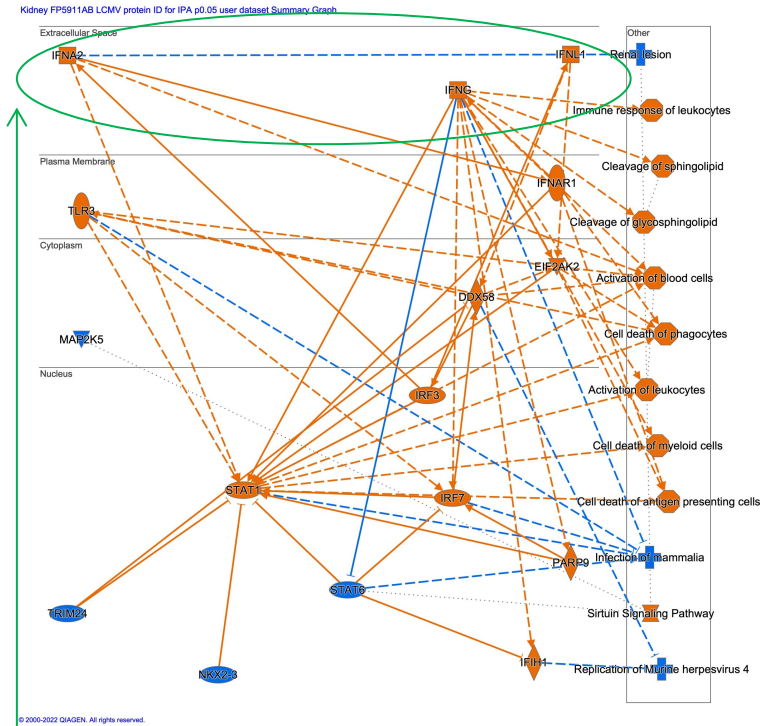

Strong cytokine response (497 protein changes)  
Strong immune response  
Decreased susceptibility to infection  
Down: Acetyl-CoA synthesis  
Down: TCA cycle  
Down: Oxidative phosphorylation  
No degeneration

8 weeks

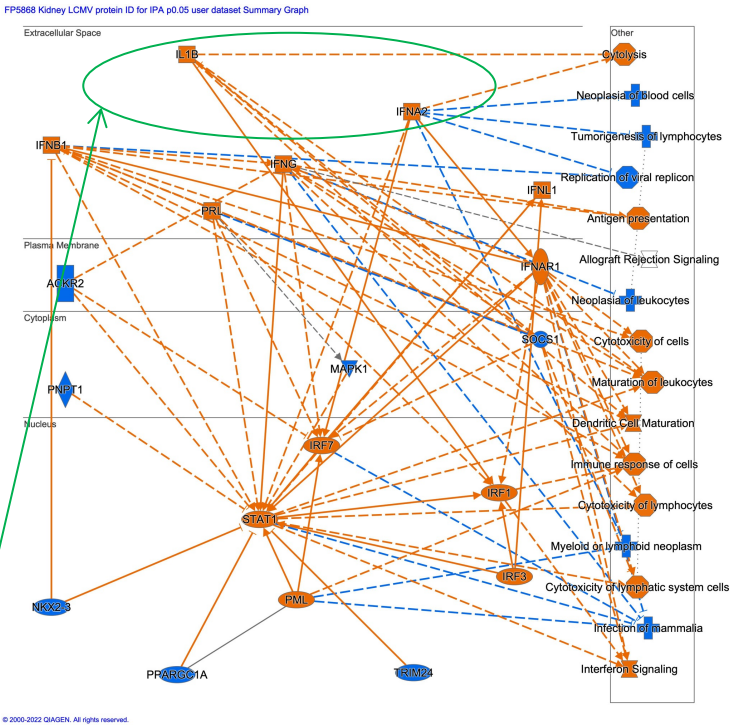

Moderate cytokine response (117 protein changes)  
Strong immune response  
Decreased susceptibility to infection  
  
Little degeneration

28 weeks

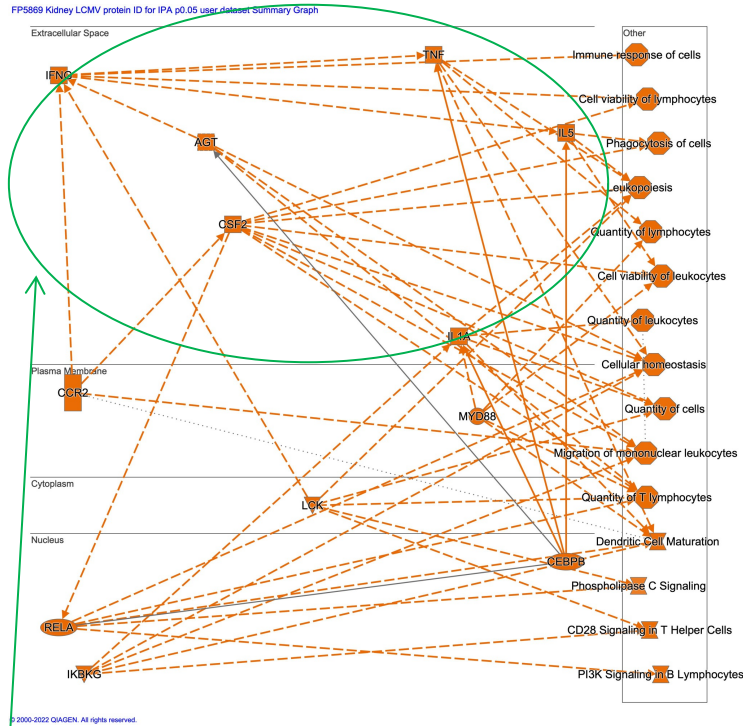

Moderate cytokine response (86 protein changes)  
Strong immune response  
Decreased susceptibility to infection  
No major STAT1 effect  
  
Some degeneration
